# Supplementary material
Source: PubMed Central journal article supplement (PMC2234203)
Supplement: pnas_0706057105_2.pdf [file pnas_0706057105_2.pdf]

**Table 1. Altered gene expression in papillomas of ATF2f/f mice**

|                              | Symbol               | Accession          | Fold Increase |
|------------------------------|----------------------|--------------------|---------------|
| Genes up-regulated by ATF2   | <i>Plf 2</i>         | NM_011118.1        | 4             |
|                              | <i>Suclg</i>         | NM_019879.1        | 5             |
|                              | <i>Cav2</i>          | NM_016900.2        | 2.5           |
|                              | <i>Syngn2</i>        | NM_009304.1        | 4             |
|                              | <i>Tcp1</i>          | NM_013686          | 4.6           |
|                              | <i>Mylc2b</i>        | NM_023402          | 3             |
|                              | <i>Actn4</i>         | NM_021895.2        | 4             |
|                              | <i>Eif4g2</i>        | NM_013507.2        | 5             |
|                              | <i>Trappc6b</i>      | XM_127025.2        | 2.4           |
|                              | <i>Napa</i>          | NM_025898.1        | 5             |
|                              | <i>Elovl1</i>        | NM_019422          | 5.4           |
|                              | <i>NUP35</i>         | AF411517.1         | 3             |
|                              | <i>H13</i>           | NM_010376.2        | 2.6           |
|                              | <i>Cd44</i>          | NM_009851.1        | 2.4           |
|                              | <i>Cd44</i>          | NM_009851.1        | 4             |
|                              | <i>Tm4sf8</i>        | NM_019793.2        | 5             |
|                              | <i>Cdk4</i>          | NM_009870.2        | 3.6           |
|                              | <i>Blnk</i>          | NM_008528.3        | 3             |
|                              | <i>Atp6v0d1</i>      | NM_013477.2        | 4             |
|                              | <i>Lamc2</i>         | NM_008485          | 4             |
|                              | <i>Btg1</i>          | NM_007569.1        | 5.6           |
|                              | <i>Gyk</i>           | NM_008194          | 2.6           |
|                              | <b>Sumo1</b>         | <b>NM_009460.1</b> | 3.2           |
|                              | <i>Ablim1</i>        | NM_178688.2        | 2.6           |
|                              | <i>6030411K04Rik</i> | BC018281           | 4             |
|                              | <i>Diap1</i>         | NM_007858.1        | 3.4           |
|                              | <i>Dsg3</i>          | NM_030596.1        | 2.8           |
|                              | <i>Fth1</i>          | NM_010239.1        | 4.8           |
|                              | <i>Hnrpk</i>         | NM_025279.1        | 4.6           |
|                              | <i>Nsdhl</i>         | NM_010941.3        | 4             |
|                              | <b>Psen1</b>         | <b>NM_008943.1</b> | 3             |
|                              | <i>Abcf2</i>         | NM_013853.1        | 4             |
|                              | <i>Ppfia1</i>        | XM_133979.4        | 2             |
| <i>Prss11</i>                | NM_019564.1          | 2.6                |               |
| <i>Klk14</i>                 | NM_174866.1          | 4                  |               |
| <i>Ckap2</i>                 | XM_134100.3          | 2                  |               |
| <i>Fstl1</i>                 | NM_008047.2          | 4                  |               |
| <i>Tubb5</i>                 | NM_011655.2          | 6                  |               |
| <i>Dsc3</i>                  | NM_007882.2          | 2                  |               |
| <i>Rhod</i>                  | NM_007485.2          | 3.2                |               |
| Genes down-regulated by ATF2 | <b>Itga6</b>         | <b>AK018033</b>    |               |
|                              | <i>PLA2</i>          | AK033572           | -2.6          |
|                              | <i>Gsdm1</i>         | NM_021347.2        | -2.4          |
|                              | <b>Egln1</b>         | <b>NM_053207.1</b> | -3            |
|                              | <i>Pdrg1</i>         | NM_178939.1        | -2.5          |
|                              | <i>Sprrl2</i>        | NM_028625.1        | -2.6          |
|                              | <i>Csrp1</i>         | NM_007791.2        | -2.2          |
|                              | <i>Defb3</i>         | NM_013756.1        | -3.4          |

Bold type indicates the validated genes by quantitative RT-PCR or by immunoblotting
