# Supplementary material
Source: PubMed Central journal article supplement (PMC2234203)

TPA

---

WT(1)

K14.  
ATF2<sup>+/+</sup>(1)

WT(2)

K14.  
ATF2<sup>+/+</sup>(2)

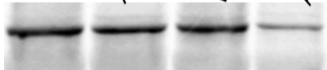

← CyclinB1

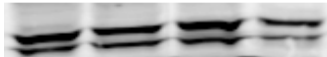

← CyclinA

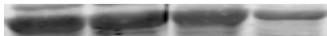

←  $\beta$ -Actin

Supplement: pnas_0706057105_1.pdf [file pnas_0706057105_1.pdf]
